# Supplementary material for: Importance of maintaining body weight for prevention of distant metastasis of nasopharyngeal carcinoma: An alternative workflow for cancer-risk assessment
Source: PubMed Central journal article supplement — J Cancer. 2017 Jul 20;8(12):2269–76. doi: 10.7150/jca.19611 (PMC5560145; doi:10.7150/jca.19611), 2017-07-20

**Supplementary Fig. S1** Funnel plot of 8 studies or subsets associated with distant-metastasis-free survival

Abbreviations: SE, standard error

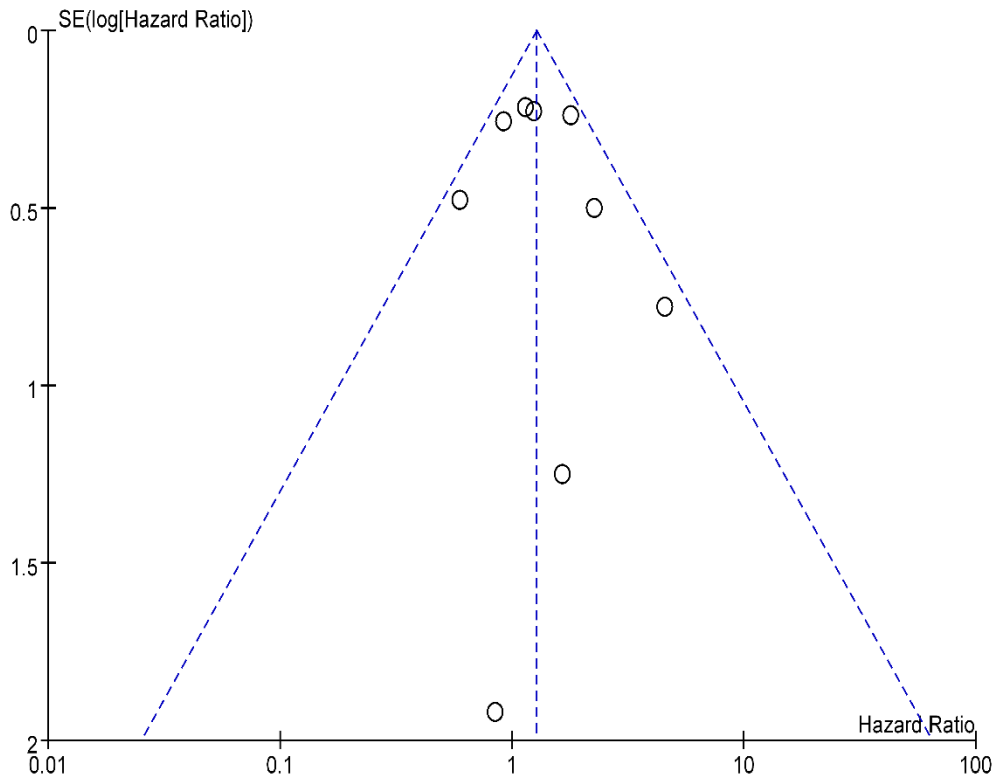

Supplement: jcav08p2269s1.pdf [file jcav08p2269s1.pdf]
